# Supplementary material
Source: Springer Nature journal article supplement (https://www.springermedizin.de/resource/supplementary/12916_2012_599_MOESM1_ESM.pdf/9597958)

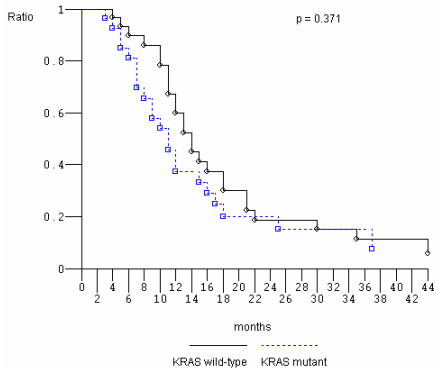

**(1)**

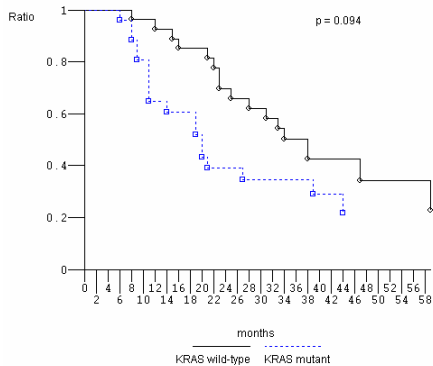

**(2)**

Supplement: MOESM1 [file 9597958]
